# Supplementary material for: Comparative Effects of Different Proteases on the Non-Volatile Taste Compounds and Volatile Flavor Fingerprints of Sarcodon imbricatus Hydrolysates
Source: MDPI journal article supplement (doi:10.3390/foods15111924), 2026-05-29
Supplement: s1 [file foods-4321499-supplementary.pdf › foods-4321499-supplementary.pdf]

Table S1 TAV values of free amino acids in *S. imbricatus* hydrolysates under different protease treatments

| Free amino acids    | Free amino acids<br>taste threshold(mg/100g) | TAV                    |                         |                         |                         |
|---------------------|----------------------------------------------|------------------------|-------------------------|-------------------------|-------------------------|
|                     |                                              | CK                     | FSIH                    | PSIH                    | BSIH                    |
| Aspartic acid(Asp)  | 100                                          | 0.74±0.02 <sup>c</sup> | 2.03±0.17 <sup>a</sup>  | 2.33±0.20 <sup>a</sup>  | 1.56±0.03 <sup>b</sup>  |
| Glutamic acid(Glu)  | 30                                           | 6.96±0.15 <sup>c</sup> | 20.31±1.76 <sup>a</sup> | 22.35±1.43 <sup>a</sup> | 15.00±0.49 <sup>b</sup> |
| Threonine*(Thr)     | 260                                          | 0.20±0.00 <sup>a</sup> | 0.85±0.04 <sup>c</sup>  | 0.70±0.05 <sup>c</sup>  | 0.47±0.01 <sup>b</sup>  |
| Serine(Ser)         | 150                                          | 0.30±0.02 <sup>c</sup> | 1.15±0.06 <sup>a</sup>  | 1.06±0.09 <sup>a</sup>  | 0.70±0.02 <sup>b</sup>  |
| Glycine(Gly)        | 130                                          | 0.11±0.01 <sup>d</sup> | 0.46±0.01 <sup>a</sup>  | 0.39±0.02 <sup>b</sup>  | 0.26±0.01 <sup>c</sup>  |
| Alanine(Ala)        | 60                                           | 2.33±0.07 <sup>c</sup> | 7.56±0.53 <sup>a</sup>  | 7.62±0.52 <sup>a</sup>  | 5.10±0.11 <sup>b</sup>  |
| Valine*(Val)        | 40                                           | 1.95±0.08 <sup>d</sup> | 10.57±0.73 <sup>a</sup> | 6.71±0.47 <sup>b</sup>  | 4.48±0.09 <sup>c</sup>  |
| Methionine*(Met)    | 30                                           | 0.17±0.04 <sup>c</sup> | 0.91±0.12 <sup>a</sup>  | 0.74±0.06 <sup>a</sup>  | 0.50±0.03 <sup>b</sup>  |
| Isoleucine*(Ile)    | 90                                           | 0.55±0.02 <sup>d</sup> | 3.88±0.19 <sup>a</sup>  | 1.93±0.11 <sup>b</sup>  | 1.30±0.03 <sup>c</sup>  |
| Leucine*(Leu)       | 190                                          | 0.45±0.02 <sup>d</sup> | 2.96±0.29 <sup>a</sup>  | 1.66±0.11 <sup>b</sup>  | 1.11±0.02 <sup>c</sup>  |
| Phenylalanine*(Phe) | 90                                           | 0.78±0.02 <sup>d</sup> | 3.94±0.25 <sup>a</sup>  | 2.92±0.17 <sup>b</sup>  | 1.94±0.04 <sup>c</sup>  |
| Arginine(Arg)       | 50                                           | 1.08±0.02 <sup>d</sup> | 5.37±0.28 <sup>a</sup>  | 4.05±0.23 <sup>b</sup>  | 2.72±0.05 <sup>c</sup>  |
| Lysine*(Lys)        | 20                                           | 1.85±0.10 <sup>b</sup> | 4.05±0.32 <sup>a</sup>  | 3.57±0.35 <sup>a</sup>  | 2.38±0.10 <sup>b</sup>  |

Note: Different uppercase and lowercase letters indicate significant differences among groups ( $p < 0.05$ ). The same applies below.

Table S2 Relative peak areas of volatile compounds in SIHs under different protease treatments determined by HS-GC-IMS

| Compounds               | Odor description     | CAS      | Formula | RI     | Rt [sec] | Dt [a.u.] | Relative peak areas         |                            |                             |                            |
|-------------------------|----------------------|----------|---------|--------|----------|-----------|-----------------------------|----------------------------|-----------------------------|----------------------------|
|                         |                      |          |         |        |          |           | CK                          | FSIH                       | PSIH                        | BSIH                       |
| Alcohols                |                      |          |         |        |          |           |                             |                            |                             |                            |
| 1-Butanol,3-met<br>hyl- | whiskey, malt, burnt | 123-51-3 | C5H12O  | 1210.6 | 743.742  | 1.24756   | 1452.38±546.79 <sup>b</sup> | 3864.72±70.11 <sup>a</sup> | 2875.50±665.89 <sup>a</sup> | 4033.69±41.94 <sup>a</sup> |
| 1-Pentanol-D            | balsamic             | 71-41-0  | C5H12O  | 1259.6 | 903.257  | 1.25428   | 351.12±26.78 <sup>b</sup>   | 464.44±20.08 <sup>a</sup>  | 469.37±60.50 <sup>a</sup>   | 515.92±25.53 <sup>a</sup>  |
| 1-Propanol-M            | alcohol, pungent     | 71-23-8  | C3H8O   | 1040.9 | 397.961  | 1.11004   | 1429.18±419.11 <sup>a</sup> | 661.45±46.08 <sup>c</sup>  | 1130.46±5.23 <sup>ab</sup>  | 858.21±59.96 <sup>b</sup>  |

|                                 |                                                               |           |         |        |          |         |                             |                             |                             |                             |
|---------------------------------|---------------------------------------------------------------|-----------|---------|--------|----------|---------|-----------------------------|-----------------------------|-----------------------------|-----------------------------|
| 2- butanol-D                    | wine                                                          | 78-92-2   | C4H10O  | 1011.4 | 361.931  | 1.33866 | 301.76±25.29 <sup>b</sup>   | 436.70±7.95 <sup>a</sup>    | 459.28±6.39 <sup>a</sup>    | 333.24±16.75 <sup>b</sup>   |
| 2- butanol-M                    | wine                                                          | 78-92-2   | C4H10O  | 1011.8 | 362.409  | 1.13723 | 164.97±23.66 <sup>a</sup>   | 144.16±4.25 <sup>a</sup>    | 149.10±3.60 <sup>a</sup>    | 155.84±8.47 <sup>a</sup>    |
| 2-Heptanol                      | mushroom                                                      | 543-49-7  | C7H16O  | 1321.5 | 1097.743 | 1.36459 | 74.31±1.59 <sup>b</sup>     | 63.69±3.08 <sup>c</sup>     | 98.52±5.70 <sup>a</sup>     | 77.13±2.53 <sup>b</sup>     |
| 2-Methyl-2-prop<br>anol         | camphor                                                       | 75-65-0   | C4H10O  | 912    | 294.879  | 1.31851 | 1104.12±426.44 <sup>a</sup> | 1280.05±171.64 <sup>a</sup> | 1043.35±326.25 <sup>a</sup> | 1000.59±400.99 <sup>a</sup> |
| 2-octanol                       |                                                               | 4128-31-8 | C8H18O  | 1002.1 | 350.652  | 1.45643 | 992.06±47.54 <sup>b</sup>   | 1445.25±20.42 <sup>a</sup>  | 1495.50±18.41 <sup>a</sup>  | 1080.45±61.66 <sup>b</sup>  |
| 3-Furanmethanol                 |                                                               | 4412-91-3 | C5H6O2  | 975.7  | 331.515  | 1.11259 | 275.07±4.69 <sup>a</sup>    | 218.33±4.28 <sup>b</sup>    | 236.14±6.04 <sup>ab</sup>   | 215.66±16.36 <sup>b</sup>   |
| 4-methyl-2-penta<br>nol         | pungent alcohol                                               | 108-11-2  | C6H14O  | 1186.9 | 671.583  | 1.55319 | 540.64±192.77 <sup>ab</sup> | 556.75±83.46 <sup>ab</sup>  | 747.42±96.92 <sup>a</sup>   | 409.13±34.57 <sup>b</sup>   |
| Esters                          |                                                               |           |         |        |          |         |                             |                             |                             |                             |
| Ethyl formate-M                 | pungent                                                       | 109-94-4  | C3H6O2  | 831.9  | 248.866  | 1.06976 | 440.82±136.02 <sup>a</sup>  | 404.95±113.91 <sup>a</sup>  | 443.99±55.92 <sup>a</sup>   | 478.25±63.87 <sup>a</sup>   |
| Ethyl formate-D                 | pungent                                                       | 109-94-4  | C3H6O2  | 835.3  | 250.844  | 1.20673 | 221.00±38.28 <sup>a</sup>   | 219.61±38.21 <sup>a</sup>   | 237.52±22.05 <sup>a</sup>   | 228.02±21.18 <sup>a</sup>   |
| Butyl formate                   | fruity plum rum brandy                                        | 592-84-7  | C5H10O2 | 1002.4 | 350.945  | 1.50858 | 1354.42±56.46 <sup>b</sup>  | 1387.36±13.36 <sup>b</sup>  | 1260.26±53.45 <sup>b</sup>  | 1672.50±72.02 <sup>a</sup>  |
| 2-methyl-1-prop<br>yl acetate   | fruit, apple, banana                                          | 110-19-0  | C6H12O2 | 1022.1 | 375.003  | 1.23382 | 112.91±4.39 <sup>b</sup>    | 133.23±5.73 <sup>b</sup>    | 211.70±39.42 <sup>a</sup>   | 225.60±37.21 <sup>a</sup>   |
| 1-Butanol,3-met<br>hyl-,acetate | banana                                                        | 123-92-2  | C7H14O2 | 1130.1 | 541.965  | 1.29804 | 84.20±9.98 <sup>c</sup>     | 542.81±2.89 <sup>a</sup>    | 104.83±9.14 <sup>b</sup>    | 103.84±2.29 <sup>b</sup>    |
| ethyl<br>hex-3-enoate           | fruity green tart<br>pineapple tropical<br>winey grape quince | 2396-83-0 | C8H14O2 | 1325.3 | 1109.176 | 1.25642 | 383.16±32.53 <sup>b</sup>   | 404.14±28.81 <sup>ab</sup>  | 481.32±47.87 <sup>a</sup>   | 390.25±24.54 <sup>ab</sup>  |
| Hexanoic acid<br>propyl ester   | furit                                                         | 626-77-7  | C9H18O2 | 1307   | 1054.278 | 1.38696 | 758.96±455.89 <sup>a</sup>  | 848.47±140.01 <sup>a</sup>  | 1027.62±221.09 <sup>a</sup> | 845.85±4.10 <sup>a</sup>    |
| hexyl formate                   | apple unripe plum<br>banana sweet                             | 629-33-4  | C7H14O2 | 1363   | 1222.371 | 1.33189 | 219.66±64.09 <sup>b</sup>   | 382.31±77.92 <sup>ab</sup>  | 223.39±92.49 <sup>b</sup>   | 541.43±41.89 <sup>a</sup>   |
| Isobutyl<br>propanoate- M       | fruity green ether sweet<br>tutti frutti banana               | 540-42-1  | C7H14O2 | 857    | 263.317  | 1.27791 | 411.20±27.18 <sup>c</sup>   | 686.99±9.28 <sup>a</sup>    | 616.59±27.83 <sup>a</sup>   | 473.35±4.17 <sup>b</sup>    |

| Chemical compounds and their associated odors |                                                                         |                  |                  |            |          |          |                             |                             |                            |                            |
|-----------------------------------------------|-------------------------------------------------------------------------|------------------|------------------|------------|----------|----------|-----------------------------|-----------------------------|----------------------------|----------------------------|
| Chemical compound                             | Odor description                                                        | Accession number | Chemical formula | MW (g/mol) | LogP     | Ref. [1] | Ref. [2]                    | Ref. [3]                    | Ref. [4]                   | Ref. [5]                   |
| (Z)-3-Hexenyl propionate                      | green pear apple fresh fruity waxy leafy                                | 33467-74-2       | C9H16O2          | 1101.6     | 476.803  | 1.38186  | 756.93±60.03 <sup>b</sup>   | 970.05±34.85 <sup>a</sup>   | 1179.72±53.70 <sup>a</sup> | 783.06±31.90 <sup>b</sup>  |
| (Z)-3-Hexenyl formate methyl                  | fresh green waxy sweet vegetable grassy sharp                           | 33467-73-1       | C7H12O2          | 1258.9     | 900.873  | 1.71409  | 92.29±3.76 <sup>b</sup>     | 110.58±24.04 <sup>b</sup>   | 87.21±3.49 <sup>b</sup>    | 190.88±16.03 <sup>a</sup>  |
| 3-methylbutanoate                             | apple                                                                   | 556-24-1         | C6H12O2          | 1013.2     | 364.167  | 1.52524  | 218.19±22.15 <sup>b</sup>   | 357.66±24.71 <sup>a</sup>   | 310.85±3.07 <sup>a</sup>   | 307.65±3.30 <sup>a</sup>   |
| sec-butyl acetate                             | solvent fruity banana                                                   | 105-46-4         | C6H12O2          | 1002.6     | 351.238  | 1.21249  | 920.86±16.88 <sup>a</sup>   | 559.50±32.76 <sup>b</sup>   | 492.64±6.32 <sup>c</sup>   | 827.91±27.60 <sup>a</sup>  |
| Butyl lactate                                 | green fruity apple kiwi melon rind lactonic waxy winey apple skin soapy | 138-22-7         | C7H14O3          | 1013.3     | 364.3    | 1.27011  | 170.46±16.62 <sup>a</sup>   | 173.49±2.85 <sup>a</sup>    | 148.80±2.28 <sup>b</sup>   | 183.88±6.73 <sup>a</sup>   |
| Methyl acetate                                | ether sweet fruity                                                      | 79-20-9          | C3H6O2           | 847.5      | 257.856  | 1.19425  | 3186.91±96.40 <sup>b</sup>  | 3686.12±138.96 <sup>a</sup> | 3573.65±41.23 <sup>a</sup> | 3097.32±96.17 <sup>b</sup> |
| phenylacetic acid butyl ester                 | rose honey chocolate                                                    | 122-43-0         | C12H16O2         | 1431.8     | 1428.536 | 1.44275  | 232.64±27.31 <sup>c</sup>   | 747.18±27.70 <sup>a</sup>   | 374.70±29.43 <sup>b</sup>  | 269.19±24.67 <sup>c</sup>  |
| Octyl-acetate Ketones                         | rose honey chocolate                                                    | 112-14-1         | C10H20O2         | 1273.7     | 949.063  | 1.53901  | 131.70±15.86 <sup>a</sup>   | 63.03±7.43 <sup>c</sup>     | 125.00±2.40 <sup>a</sup>   | 88.71±3.31 <sup>b</sup>    |
| 1-Octen-3-one-M                               | herbal mushroom earthy musty dirty                                      | 4312-99-6        | C8H14O           | 1306.9     | 1054.02  | 1.27244  | 2588.00±132.79 <sup>b</sup> | 3352.12±64.04 <sup>a</sup>  | 3376.80±64.95 <sup>a</sup> | 2576.66±20.42 <sup>b</sup> |
| 1-Octen-3-one-D                               | herbal mushroom earthy musty dirty                                      | 4312-99-6        | C8H14O           | 1306.4     | 1052.605 | 1.67928  | 471.36±17.75 <sup>c</sup>   | 870.72±19.83 <sup>a</sup>   | 949.32±37.43 <sup>a</sup>  | 529.37±16.73 <sup>b</sup>  |
| 2-Heptanone-M                                 | soap                                                                    | 110-43-0         | C7H14O           | 1183.2     | 663.164  | 1.26059  | 1109.50±85.15 <sup>b</sup>  | 1501.15±80.38 <sup>a</sup>  | 1443.94±16.88 <sup>a</sup> | 1449.14±25.70 <sup>a</sup> |
| 2-Heptanone-D                                 | soap                                                                    | 110-43-0         | C7H14O           | 1183.5     | 663.775  | 1.62658  | 318.87±81.28 <sup>c</sup>   | 517.78±26.21 <sup>ab</sup>  | 615.28±84.61 <sup>a</sup>  | 336.49±31.37 <sup>bc</sup> |
| 2-methyl-2-hepten-6-one                       | pepper, mushroom, rubber                                                | 110-93-0         | C8H14O           | 1341.3     | 1157.305 | 1.18292  | 776.27±211.70 <sup>b</sup>  | 1207.39±64.87 <sup>a</sup>  | 870.07±22.61 <sup>ab</sup> | 738.18±26.22 <sup>b</sup>  |
| 3-Octanone                                    | herb, butter, resin                                                     | 106-68-3         | C8H16O           | 1258.9     | 900.873  | 1.30832  | 287.16±70.92 <sup>b</sup>   | 547.60±104.86 <sup>ab</sup> | 296.58±104.55 <sup>b</sup> | 895.58±81.60 <sup>a</sup>  |

|                                       |                                                      |            |         |        |          |         |                               |                               |                              |                             |
|---------------------------------------|------------------------------------------------------|------------|---------|--------|----------|---------|-------------------------------|-------------------------------|------------------------------|-----------------------------|
| 4-Methyl-2-penta<br>none<br>Aldehydes | sharp solvent green<br>herbal fruity dairy spice     | 108-10-1   | C6H12O  | 1013.1 | 364.09   | 1.46943 | 153.30±3.30 <sup>b</sup>      | 279.44±4.17 <sup>a</sup>      | 276.78±2.35 <sup>a</sup>     | 164.06±11.63 <sup>b</sup>   |
| (E)-2-nonenal-D                       | Cucumber, fat, green                                 | 18829-56-6 | C9H16O  | 1459   | 1510.243 | 1.95178 | 679.05±51.72 <sup>a</sup>     | 610.67±60.86 <sup>a</sup>     | 715.42±33.58 <sup>a</sup>    | 745.37±43.07 <sup>a</sup>   |
| (E)-2-nonenal-M                       | Cucumber, fat, green                                 | 18829-56-6 | C9H16O  | 1459.4 | 1511.231 | 1.39477 | 1873.86±173.37 <sup>c</sup>   | 2081.65±36.87 <sup>bc</sup>   | 2553.67±134.08 <sup>ab</sup> | 2828.77±73.14 <sup>a</sup>  |
| (E)-2-Pentenal                        | strawberry, fruit,<br>tomato                         | 1576-87-0  | C5H8O   | 1128.5 | 538.244  | 1.36862 | 83.58±6.19 <sup>c</sup>       | 212.18±4.99 <sup>a</sup>      | 116.21±13.65 <sup>b</sup>    | 80.17±4.77 <sup>c</sup>     |
| 1-hexanal-M                           | grass, tallow, fat                                   | 66-25-1    | C6H12O  | 1096.9 | 466.333  | 1.55667 | 373.77±319.36 <sup>a</sup>    | 233.55±309.98 <sup>a</sup>    | 689.29±275.70 <sup>a</sup>   | 426.64±138.96 <sup>a</sup>  |
| 1-hexanal-D                           | grass, tallow, fat                                   | 66-25-1    | C6H12O  | 1085.2 | 452.037  | 1.55706 | 1388.08±125.36 <sup>c</sup>   | 1686.87±27.37 <sup>b</sup>    | 1934.28±99.88 <sup>ab</sup>  | 2153.43±22.55 <sup>a</sup>  |
| 1-nonanal-M                           | fat, citrus, green                                   | 124-19-6   | C9H18O  | 1397.8 | 1326.664 | 1.48022 | 8349.83±2581.08 <sup>a</sup>  | 6942.96±1752.69 <sup>a</sup>  | 7664.13±737.10 <sup>a</sup>  | 4242.72±355.52 <sup>b</sup> |
| 1-nonanal-D                           | fat, citrus, green                                   | 124-19-6   | C9H18O  | 1397.3 | 1325.173 | 1.9431  | 2561.42±2626.52 <sup>a</sup>  | 1468.23±1043.72 <sup>a</sup>  | 1652.39±371.08 <sup>a</sup>  | 339.43±70.69 <sup>a</sup>   |
| 1-octanal                             | fat, soap, lemon, green                              | 124-13-0   | C8H16O  | 1294.2 | 1015.834 | 1.41019 | 2860.04±1531.22 <sup>ab</sup> | 2226.51±1016.86 <sup>ab</sup> | 2905.67±965.47 <sup>a</sup>  | 1218.15±167.47 <sup>b</sup> |
| 2-methyl-2-prope<br>nal               | wild hyacinth foliage                                | 78-85-3    | C4H6O   | 890.5  | 282.575  | 1.22496 | 3167.85±109.57 <sup>ab</sup>  | 3015.46±107.68 <sup>ab</sup>  | 3400.10±116.21 <sup>a</sup>  | 2898.73±133.66 <sup>b</sup> |
| 2-Methylbutanal                       | Cocoa, almond                                        | 96-17-3    | C5H10O  | 909.2  | 293.294  | 1.16096 | 137.68±51.42 <sup>a</sup>     | 131.56±16.11 <sup>a</sup>     | 100.00±28.66 <sup>a</sup>    | 118.50±46.77 <sup>a</sup>   |
| 3-Methyl-2-bute<br>nal                | sweet fruity pungent<br>brown nutty almond<br>cherry | 107-86-8   | C5H8O   | 1203.9 | 721.912  | 1.09181 | 318.02±18.65 <sup>b</sup>     | 353.33±6.84 <sup>ab</sup>     | 378.86±16.57 <sup>a</sup>    | 241.27±7.28 <sup>c</sup>    |
| Butanal                               | pungent, green                                       | 123-72-8   | C4H8O   | 880.9  | 277.042  | 1.10796 | 469.45±5.19 <sup>c</sup>      | 522.52±4.72 <sup>a</sup>      | 485.85±4.65 <sup>b</sup>     | 450.59±1.84 <sup>d</sup>    |
| (Z)-4-heptenal                        | biscuit, cream                                       | 6728-31-0  | C7H12O  | 1274.4 | 951.212  | 1.14806 | 6593.95±405.86 <sup>a</sup>   | 4455.47±198.34 <sup>c</sup>   | 6191.20±46.66 <sup>a</sup>   | 5198.58±10.39 <sup>b</sup>  |
| Heptaldehyde-M                        | fat, citrus, rancid                                  | 111-71-7   | C7H14O  | 1187.8 | 673.554  | 1.33893 | 3341.68±1136.07 <sup>ab</sup> | 2769.46±503.05 <sup>ab</sup>  | 3363.57±379.33 <sup>a</sup>  | 2214.47±145.64 <sup>b</sup> |
| Heptaldehyde-D                        | fat, citrus, rancid                                  | 111-71-7   | C7H14O  | 1186.5 | 670.791  | 1.69611 | 1055.34±959.84 <sup>a</sup>   | 603.99±296.66 <sup>a</sup>    | 1038.24±352.29 <sup>a</sup>  | 319.23±59.94 <sup>a</sup>   |
| Acids                                 |                                                      |            |         |        |          |         |                               |                               |                              |                             |
| 2-Methylheptano<br>ic acid            | waxy green cheese<br>sweaty butter milk              | 1188-02-9  | C8H16O2 | 1143.6 | 572.835  | 1.41008 | 260.54±8.73 <sup>b</sup>      | 271.45±30.16 <sup>b</sup>     | 363.38±8.20 <sup>a</sup>     | 220.49±9.77 <sup>c</sup>    |
| Acetic acid                           | sour                                                 | 64-19-7    | C2H4O2  | 1507.6 | 1655.835 | 1.05712 | 13304.09±2439.77 <sup>a</sup> | 6339.86±483.43 <sup>b</sup>   | 3893.85±566.10 <sup>c</sup>  | 3102.05±288.21 <sup>c</sup> |

|                               |                                |            |         |        |          |         |                              |                             |                               |                             |
|-------------------------------|--------------------------------|------------|---------|--------|----------|---------|------------------------------|-----------------------------|-------------------------------|-----------------------------|
| Heterocyclic                  |                                |            |         |        |          |         |                              |                             |                               |                             |
| (2,6)-dimethylpyrazine        | roasted nut, cocoa, roast beef | 108-50-9   | C6H8N2  | 1306.5 | 1052.825 | 1.53644 | 111.03±6.29 <sup>c</sup>     | 176.03±2.89 <sup>ab</sup>   | 193.75±7.14 <sup>a</sup>      | 144.44±20.38 <sup>b</sup>   |
| 2-Methylpyrazine              | popcorn                        | 109-08-0   | C5H6N2  | 1273.5 | 948.415  | 1.07475 | 990.07±34.14 <sup>a</sup>    | 610.20±20.45 <sup>d</sup>   | 832.96±27.03 <sup>b</sup>     | 678.10±8.46 <sup>c</sup>    |
| 2-Propylpyrazine<br>Coumaran  | green vegetable nutty          | 18138-03-9 | C7H10N2 | 1435.7 | 1440.365 | 1.22071 | 508.48±67.68 <sup>c</sup>    | 3592.90±31.30 <sup>a</sup>  | 1758.80±1230.42 <sup>ab</sup> | 837.47±52.49 <sup>bc</sup>  |
|                               |                                | 496-16-2   | C8H8O   | 1101.6 | 476.879  | 1.09179 | 138.88±24.81 <sup>a</sup>    | 151.41±22.93 <sup>a</sup>   | 154.87±13.39 <sup>a</sup>     | 110.85±1.96 <sup>b</sup>    |
| 2-ethyl furan                 | sweet burnt earthy malty       | 3208-16-0  | C6H8O   | 953.4  | 318.713  | 1.297   | 1458.02±73.70 <sup>a</sup>   | 1403.87±42.13 <sup>a</sup>  | 1501.83±24.02 <sup>a</sup>    | 1424.73±119.49 <sup>a</sup> |
| 2-pentyl furan                | green bean, butter             | 3777-69-3  | C9H14O  | 1231.7 | 812.488  | 1.25117 | 1121.28±41.20 <sup>b</sup>   | 1647.71±217.24 <sup>a</sup> | 1705.09±216.91 <sup>a</sup>   | 1394.61±55.51 <sup>a</sup>  |
| 2-Methylthiophene             | sulfur                         | 554-14-3   | C5H6S   | 1095.7 | 464.796  | 1.01626 | 38.99±8.62 <sup>a</sup>      | 39.83±8.69 <sup>a</sup>     | 54.62±2.70 <sup>a</sup>       | 55.05±3.81 <sup>a</sup>     |
| Tetrahydrofuran               |                                | 109-99-9   | C4H8O   | 868.3  | 269.797  | 1.05513 | 6059.20±76.71 <sup>a</sup>   | 5198.77±235.78 <sup>b</sup> | 5199.00±133.36 <sup>b</sup>   | 5838.61±188.68 <sup>a</sup> |
| Hydrocarbons                  |                                |            |         |        |          |         |                              |                             |                               |                             |
| 1-octene                      | gasoline                       | 111-66-0   | C8H16   | 831    | 248.318  | 1.45295 | 336.97±79.68 <sup>a</sup>    | 329.41±20.64 <sup>a</sup>   | 335.93±40.66 <sup>a</sup>     | 307.31±19.12 <sup>a</sup>   |
| (R)-alpha-pinene              |                                | 14575-92-9 | C10H16  | 937.7  | 309.68   | 1.28276 | 1328.32±111.37 <sup>ab</sup> | 951.65±43.80 <sup>b</sup>   | 655.70±11.26 <sup>c</sup>     | 1774.26±421.80 <sup>a</sup> |
| alpha-Pinene                  |                                | 2437-95-8  | C10H16  | 1037   | 393.223  | 1.21093 | 275.04±32.78 <sup>c</sup>    | 1289.40±61.77 <sup>a</sup>  | 435.01±13.54 <sup>b</sup>     | 258.26±13.80 <sup>c</sup>   |
| 2,2,4,6,6-Pentamethylheptane  |                                | 13475-82-6 | C12H26  | 987.3  | 338.2    | 1.33866 | 681.22±20.66 <sup>bc</sup>   | 796.66±41.14 <sup>ab</sup>  | 631.33±32.05 <sup>c</sup>     | 813.78±38.14 <sup>a</sup>   |
| Benzene, propyl-ethyl benzene |                                | 103-65-1   | C9H12   | 1184.4 | 665.993  | 1.51713 | 405.91±63.65 <sup>c</sup>    | 555.96±11.90 <sup>ab</sup>  | 624.28±49.67 <sup>a</sup>     | 418.50±12.55 <sup>bc</sup>  |
|                               |                                | 100-41-4   | C8H10   | 1128.6 | 538.628  | 1.077   | 104.74±10.38 <sup>b</sup>    | 272.11±5.62 <sup>a</sup>    | 109.60±5.04 <sup>b</sup>      | 107.33±4.80 <sup>b</sup>    |
| Others                        |                                |            |         |        |          |         |                              |                             |                               |                             |
| hexanenitrile                 |                                | 628-73-9   | C6H11N  | 880.6  | 276.861  | 1.27964 | 279.19±1.48 <sup>b</sup>     | 600.10±10.94 <sup>a</sup>   | 573.59±23.49 <sup>a</sup>     | 297.12±17.42 <sup>b</sup>   |
| 1-propanethiol                | cabbage natural gas            | 107-03-9   | C3H8S   | 877.4  | 275.017  | 1.17678 | 820.21±5.40 <sup>c</sup>     | 1033.06±16.09 <sup>a</sup>  | 1066.72±12.56 <sup>a</sup>    | 869.65±15.45 <sup>b</sup>   |
| dimethyl sulfide              | sweet onion                    |            |         |        |          |         |                              |                             |                               |                             |
|                               | cabbage, sulfur,               | 75-18-3    | C2H6S   | 822.9  | 243.702  | 0.95584 | 5580.82±950.23 <sup>a</sup>  | 5304.46±894.86 <sup>a</sup> | 4769.49±488.89 <sup>a</sup>   | 5040.73±454.32 <sup>a</sup> |

|                        |                          |          |         |       |         |         |                          |                           |                          |                           |
|------------------------|--------------------------|----------|---------|-------|---------|---------|--------------------------|---------------------------|--------------------------|---------------------------|
| 1,1-diethoxy<br>ethane | gasoline<br>fruit, cream | 105-57-7 | C6H14O2 | 889.9 | 282.224 | 1.04156 | 448.32±9.53 <sup>a</sup> | 345.34±8.43 <sup>bc</sup> | 337.17±9.63 <sup>c</sup> | 380.19±18.74 <sup>b</sup> |
|------------------------|--------------------------|----------|---------|-------|---------|---------|--------------------------|---------------------------|--------------------------|---------------------------|

Table S3 ROAV values of aroma-active compounds in *S. imbricatus* hydrolysates under different protease treatments

| Compounds        | Threshold(mg/kg) | CAS        | CK     | FSIH   | PSIH   | BSIH   |
|------------------|------------------|------------|--------|--------|--------|--------|
| 1-Octen-3-one    | 0.000003         | 4312-99-6  | 100.00 | 100.00 | 100.00 | 100.00 |
| (Z)-4-heptenal   | 0.000025         | 6728-31-0  | 25.90  | 12.66  | 17.17  | 20.08  |
| (E)-2-nonenal-D  | 0.00019          | 18829-56-6 | 1.31   | 1.01   | 1.19   | 1.82   |
| dimethyl sulfide | 0.00012          | 75-18-3    | 4.59   | 3.14   | 2.75   | 4.06   |
| 1-nonanal        | 0.0011           | 124-19-6   | 0.95   | 0.54   | 0.59   | 0.40   |
| Heptaldehyde     | 0. 0028          | 111-71-7   | 0.15   | 0.09   | 0.11   | 0.09   |
